# Supplementary material for: Quantitative assessment of intracellular/extracellular dimethyl sulfoxide concentrations during freezing with low-temperature confocal Raman micro-spectroscopy
Source: Royal Society of Chemistry journal article supplement (doi:10.1039/d2an01288j), 2022-10-19
Supplement: d2an01288j1.pdf [file d2an01288j1.pdf]

## Supporting Information

### ***Quantitative assessment on intra/extracellular Dimethyl sulfoxide concentration during freezing with low-temperature confocal Raman micro-spectroscopy***

Taijie Zhan<sup>a</sup>, Wenya Niu<sup>a</sup>, Mengdong Cui<sup>a</sup>, Hengxin Han<sup>a</sup>, Ding Wang<sup>b</sup>, Yi Xu<sup>a,\*</sup>

<sup>a</sup> *Institute of Bio-thermal Science and Technology, Shanghai Collaborative Innovation Center of Tumor Energy Therapy Technology and Devices, Shanghai Cryogenic preservation technology service platform for biological resources, University of Shanghai for Science and Technology, Shanghai, 20093, China.*

<sup>b</sup> *School of Materials Science and Engineering, University of Shanghai for Science and Technology, Shanghai, 200093, China.*

\*Corresponding author , E-mail address: [xuyi@usst.edu.cn](mailto:xuyi@usst.edu.cn)

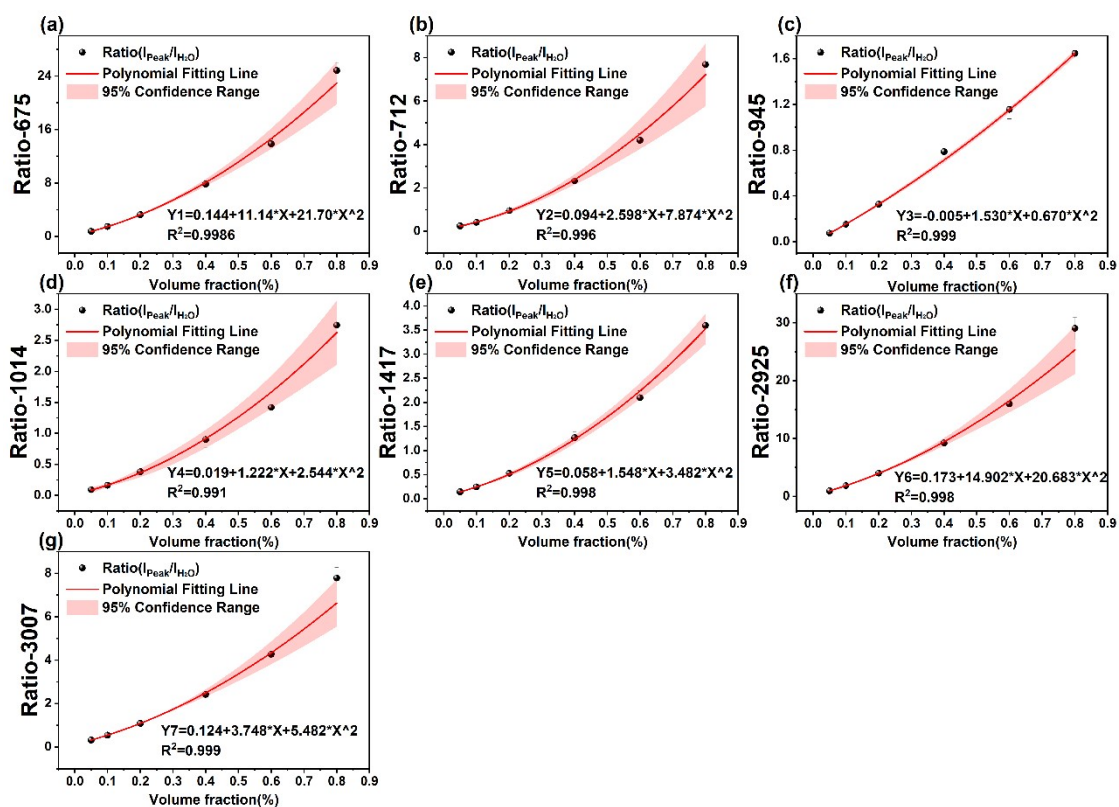

Fig.S1 Relationship between DMSO concentration and labeled peak intensity (a)~(f) correspond to each labeled peak respectively.

**Tabel.S1** Verification of the accuracy of quantitative analysis equations

| Peak/cm-1    | ~675                                                                                                                    | ~712           | ~947          | ~1014         | ~1417                   | ~2925           | ~3007         |         |
|--------------|-------------------------------------------------------------------------------------------------------------------------|----------------|---------------|---------------|-------------------------|-----------------|---------------|---------|
| Relationship | $Y1=0.144+11.14*X$ $Y2=0.094+2.598*Y3=-0.005+1.530*X$ $Y4=0.019+1.222*Y5=0.058+1.548$ $Y6=0.173+14.902*Y7=0.124+3.748*$ |                |               |               |                         |                 |               |         |
|              | $X+21.70*X^2$                                                                                                           | $*X+7.874*X^2$ | $+ 0.670*X^2$ | $X+2.544*X^2$ | $*X+3.482*X^2$          | $X+20.683*X^2$  | $X+5.482*X^2$ |         |
| <b>15 %</b>  | <b>Ratio of intensity</b>                                                                                               | 2.4582         | 0.8709        | 0.4061        | 0.4148                  | 0.4813          | 2.9493        | 0.8470  |
|              | <b>Concentration</b>                                                                                                    | 15.89 %        | 18.99 %       | 24.29 %       | 22.23 %                 | 19.13 %         | 15.35 %       | 15.68 % |
|              | <b>Deviation</b>                                                                                                        | 0.89 %         | 3.99 %        | 9.29 %        | 7.23 %                  | 4.13 %          | 0.35 %        | 0.68 %  |
|              | <b>SD</b>                                                                                                               | 5.94 %         | 26.58 %       | 61.92 %       | 48.23 %                 | 27.50 %         | 2.30 %        | 4.56 %  |
|              | <b>RMSE</b>                                                                                                             | <b>4.97 %</b>  |               |               | <b>Rate of recovery</b> | <b>125.29 %</b> |               |         |
| <b>25 %</b>  | <b>Ratio of intensity</b>                                                                                               | 5.1267         | 1.5089        | 0.5351        | 0.5514                  | 0.8433          | 5.9867        | 1.5211  |
|              | <b>Concentration</b>                                                                                                    | 28.71 %        | 28.99 %       | 31.07 %       | 27.72 %                 | 30.21 %         | 28.04 %       | 26.78 % |
|              | <b>Deviation</b>                                                                                                        | 3.71 %         | 3.99 %        | 6.07 %        | 2.72 %                  | 5.21 %          | 3.04 %        | 1.78 %  |
|              | <b>SD</b>                                                                                                               | 14.84 %        | 15.97 %       | 24.28 %       | 10.88 %                 | 20.84 %         | 12.16 %       | 7.11 %  |
|              | <b>RMSE</b>                                                                                                             | <b>4.03 %</b>  |               |               | <b>Rate of recovery</b> | <b>115.16 %</b> |               |         |
| <b>35 %</b>  | <b>Ratio of intensity</b>                                                                                               | 6.9814         | 2.1297        | 0.6496        | 0.7617                  | 1.1292          | 8.6183        | 2.2195  |
|              | <b>Concentration</b>                                                                                                    | 36.07 %        | 36.96 %       | 36.84 %       | 35.19 %                 | 37.53 %         | 37.28 %       | 36.46 % |
|              | <b>Deviation</b>                                                                                                        | 1.07 %         | 1.96 %        | 1.84 %        | 0.19 %                  | 2.53 %          | 2.28 %        | 1.46 %  |
|              | <b>SD</b>                                                                                                               | 3.06 %         | 5.60 %        | 5.27 %        | 0.53 %                  | 7.23 %          | 6.51 %        | 4.16 %  |
|              | <b>RMSE</b>                                                                                                             | <b>1.78 %</b>  |               |               | <b>Rate of recovery</b> | <b>104.62 %</b> |               |         |
| <b>50 %</b>  | <b>Ratio of intensity</b>                                                                                               | 10.1420        | 3.0884        | 0.9361        | 1.0684                  | 1.5852          | 11.7605       | 3.1243  |
|              | <b>Concentration</b>                                                                                                    | 50.86 %        | 49.52 %       | 50.55 %       | 48.72 %                 | 48.57 %         | 49.90 %       | 49.88 % |
|              | <b>Deviation</b>                                                                                                        | 0.86 %         | -0.48 %       | 0.55 %        | -1.28 %                 | -1.43 %         | -0.10 %       | -0.12 % |
|              | <b>SD</b>                                                                                                               | 1.73 %         | -0.96 %       | 1.09 %        | -2.55 %                 | -2.86 %         | -0.20 %       | -0.25 % |
|              | <b>RMSE</b>                                                                                                             | <b>0.84 %</b>  |               |               | <b>Rate of recovery</b> | <b>99.43 %</b>  |               |         |

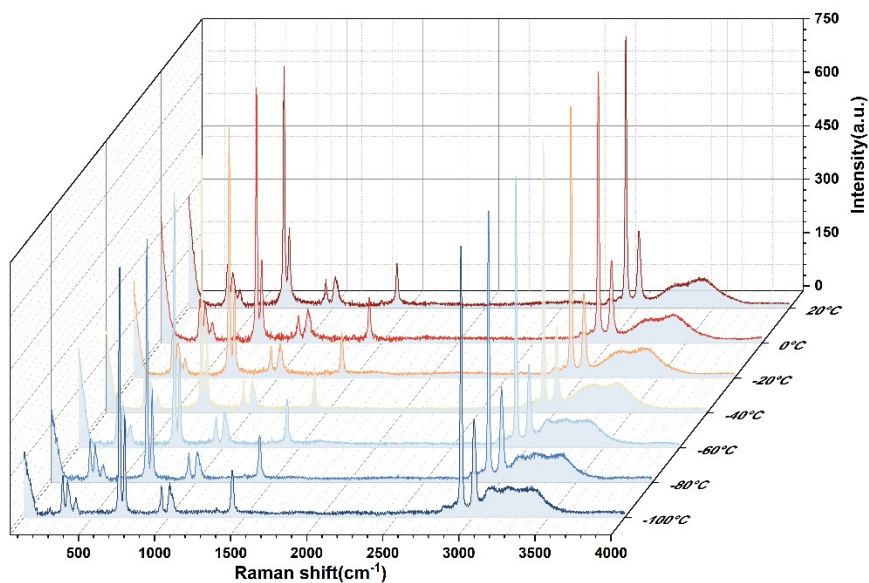

Fig.S2 Original spectra of 45% concentration solution at different temperatures

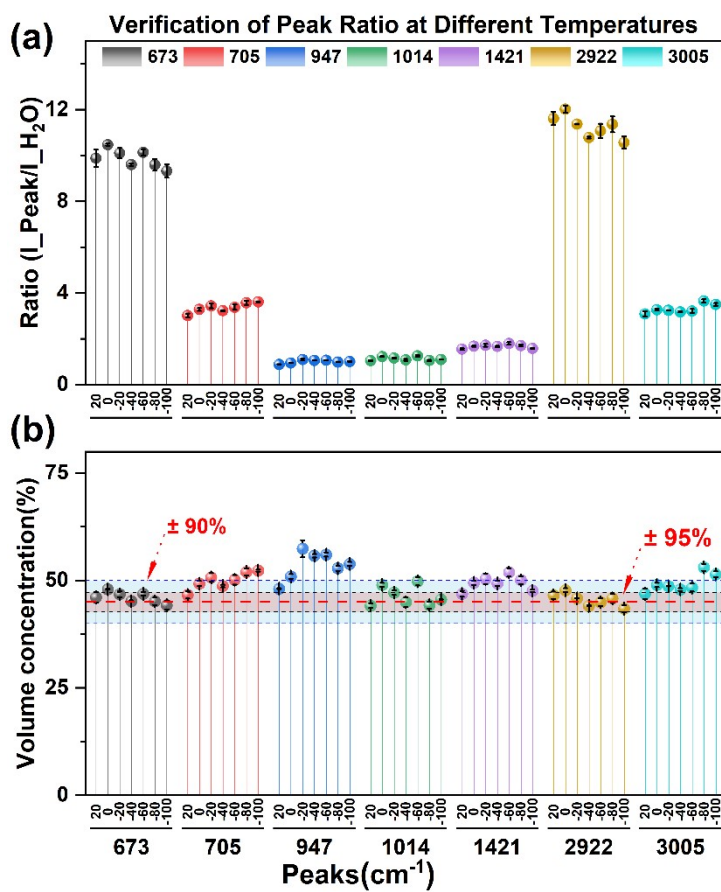

Fig.S3 Verification of invariance of peak ratios (a) and quantification concentration (b) at different temperatures.
